# Supplementary material
Source: PubMed Central journal article supplement (PMC8644293)
Supplement: kiab384_supplementary_data.pdf [file kiab384_supplementary_data.pdf]

# **AtPGAP1 functions as a GPI inositol-deacylase required for efficient transport of GPI-anchored proteins**

César Bernat-Silvestre, Judit Sanchez-Simarro, Yingxuan Ma, Javier Montero-Pau, Kim Johnson, Fernando Aniento and María Jesús Marcote

## **SUPPLEMENTAL MATERIAL**

**Supplemental Figure S1. Phylogenetic analysis of *PGAP1*-like genes.**

**Supplemental Figure S2. Alignment of N-terminal sequences and topology prediction of AtPGAP1, HsPGAP1 and Bst1p.**

**Supplemental Figure S3. Developmental expression of Arabidopsis *PGAP1*.**

**Supplemental Figure S4. Root length in *pgap1* mutants.**

**Supplemental Figure S5. Localization of xyloglucan and arabinogalactan epitopes in wild-type (Col-0) and *pgap1-3*.**

**Supplemental Figure S6. Localization of V-FLA11 in wild-type (Col-0) seedlings.**

**Supplemental Figure S7. Localization of GFP-AGP4 and PIP2A-RFP in *pgap1-3* seedlings.**

**Supplemental Figure S8. Localization of organelle marker proteins in wild-type (Col-0) and *pgap1-3*.**

**Supplemental Figure S9. Mutants in other AB\_hydrolases different from PGAP1.**

**Supplemental Figure S10. Localization of plasma membrane proteins in mutants of other AB\_hydrolases different from PGAP1.**

**Supplemental Figure S11. Localization of plasma membrane proteins without a GPI anchor in wild-type and *pgap1-1* protoplasts.**

**Supplemental Figure S12. Biochemical characterization of V-FLA11.**

**Supplemental Table S1. Putative *Arabidopsis* GPI inositol-deacylase *PGAP1*-like genes.**

**Supplemental Table S2. Polysaccharide calculations.**

**Supplemental Table S3. T-DNA mutants and PCR primers used for their characterization.**

**Supplemental Table S4. List of primers used for RT-sqPCR.**

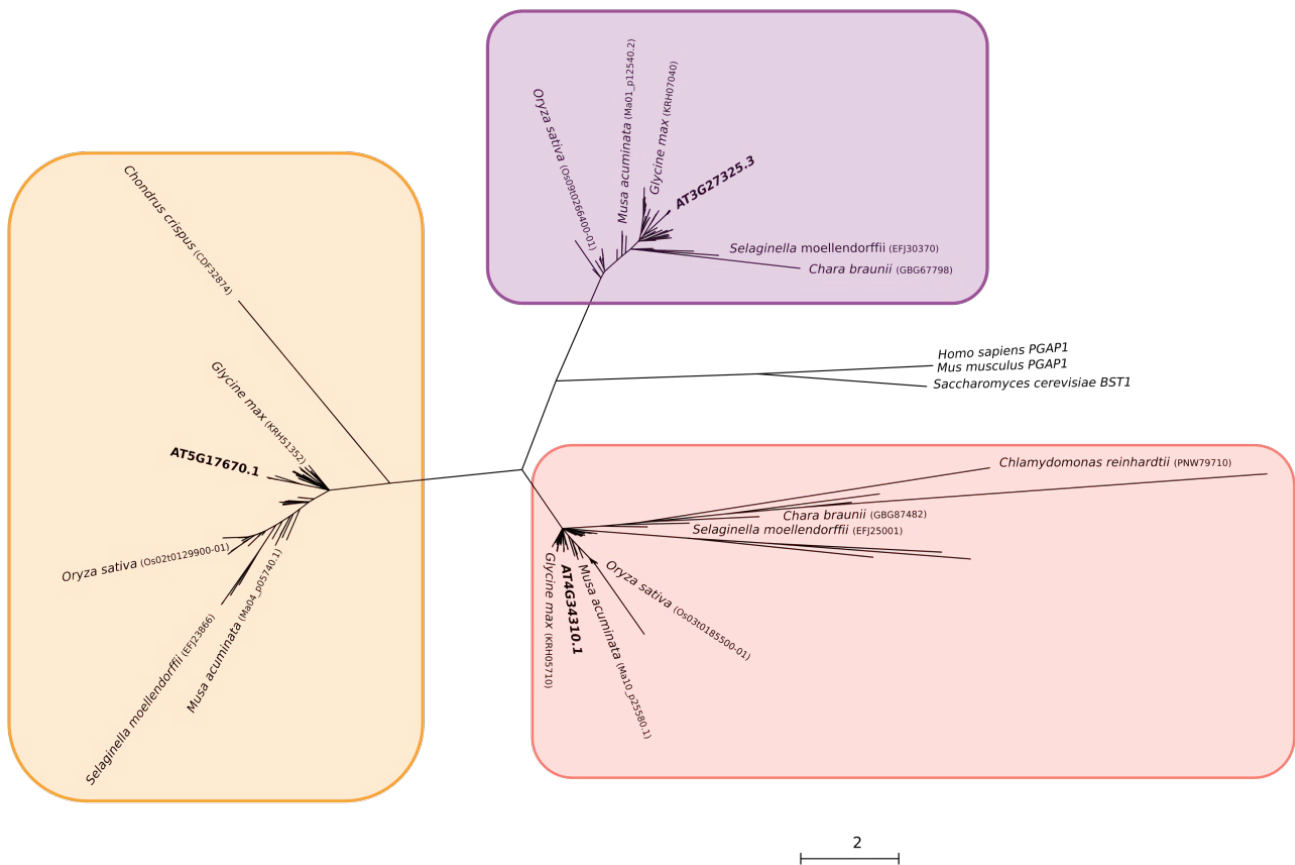

**Supplemental Figure S1. Phylogenetic analysis of *PGAP1*-like genes.** Maximum-likelihood tree based on 271 protein ortholog sequences of the three *Arabidopsis* genes presenting a complete or partial *PGAP1* motif. For clarity purposes, only a few species names are shown. Codes between parentheses correspond to Ensemble Plant IDs. Nodes with a bootstrap support lower than 80% have been collapsed.



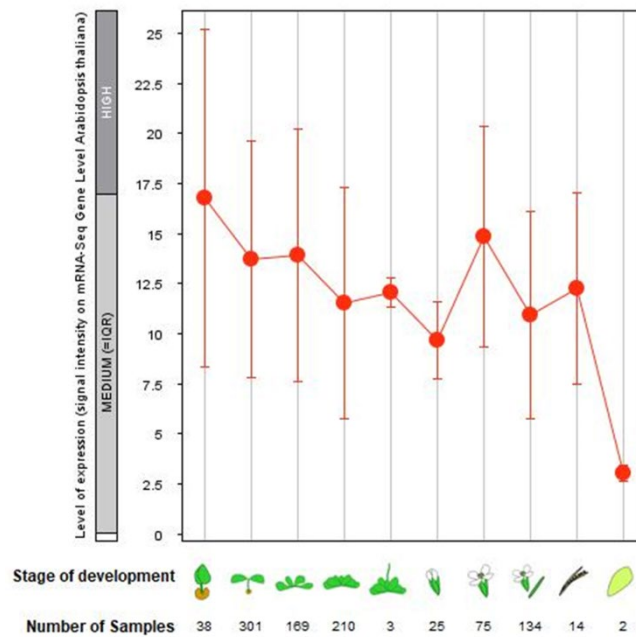

**Supplemental Figure S3. Developmental expression of Arabidopsis PGAP1.** Developmental stage-specific expression patterns of PGAP1. Seedlings, rosette leaves, floral organs and siliques are sequentially marked from left to right. “HIGH,” “MEDIUM,” and “LOW” expression were calculated by RNA-seq assay. The number of samples indicates RNA-seq gene expression data collected by GENEVESTIGATOR ([www.genevestigator.com](http://www.genevestigator.com)). Error bars represent standard deviation.

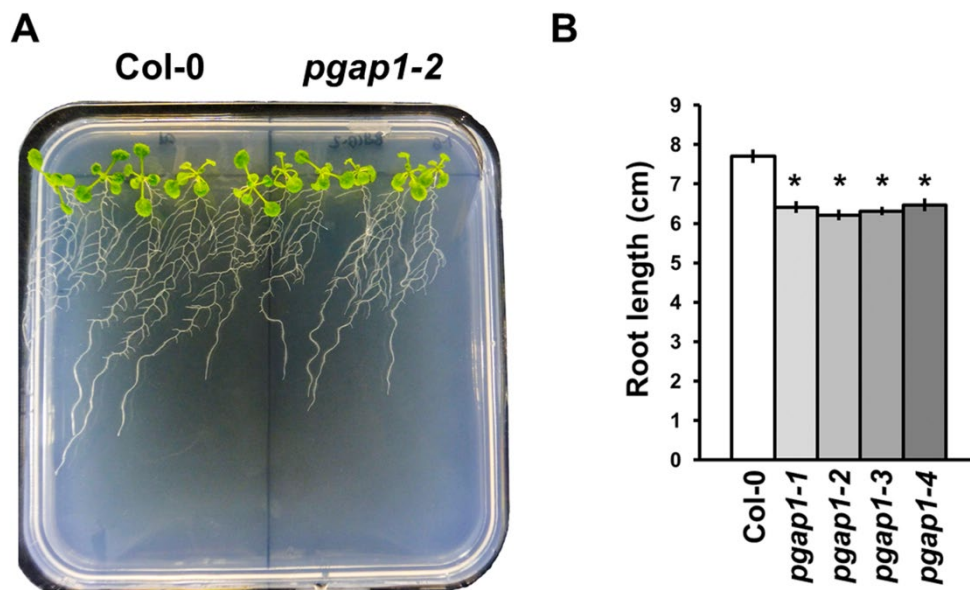

**Supplemental Figure S4. Root length in *pgap1* mutants.** A. 13 day-old seedlings of wild-type and *pgap1-2* mutant. B. Quantification of root length (cm) of *pgap1* mutants and wild-type 13 day-old seedlings expressed as mean  $\pm$  SEM (n = 12). \* statistic differences based on Student's t test with  $p < 0.05$ .

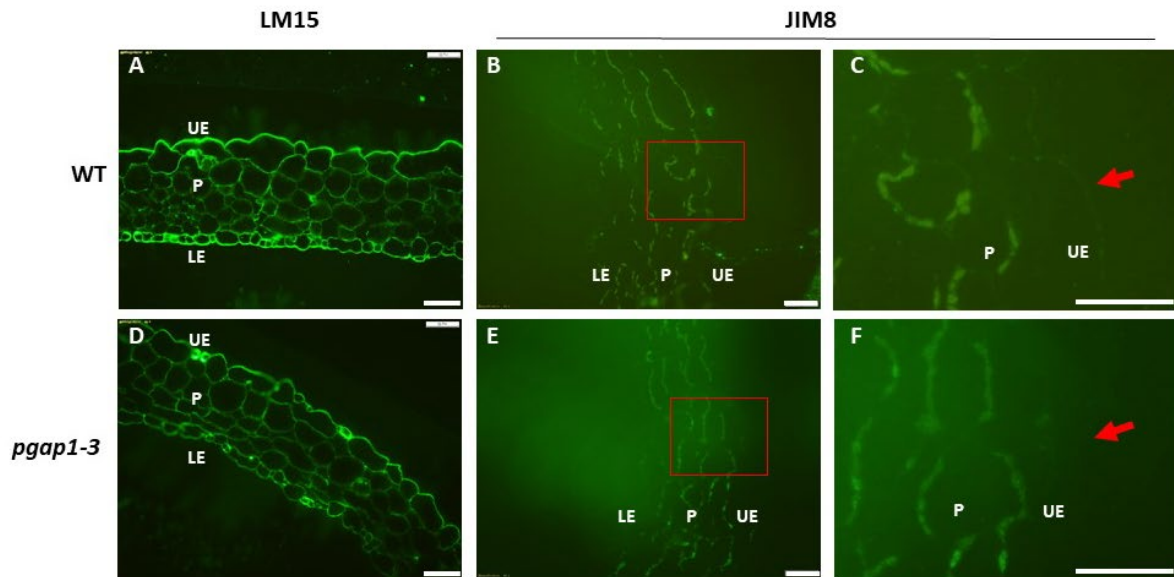

**Supplemental Figure S5. Fluorescence labelling of antibodies detecting xyloglucan (LM15) and arabinogalactan-protein (JIM8) epitopes in cell walls of wild-type (*Col-0*) and *pgap1-3* cotyledons.** LM15 signals were detected in transverse sections of wild-type (A) and *pgap1-3* (D) cotyledon walls of all cell types including upper epidermis (UE), lower epidermis (LE) and parenchyma (P). Immunofluorescence detection of arabinogalactan-protein epitopes recognized by JIM8 showed a weak signal in walls of the upper and lower epidermis of wild-type (B,C) that could not be detected in *pgap1-3* cotyledons (E,F). Boxed region in B and E shown at higher magnification in C and F with red arrows indicating walls of the upper epidermis. Scale bar = 20  $\mu$ m. Images are representative of 2 biological replicates, each with 2 technical replicates

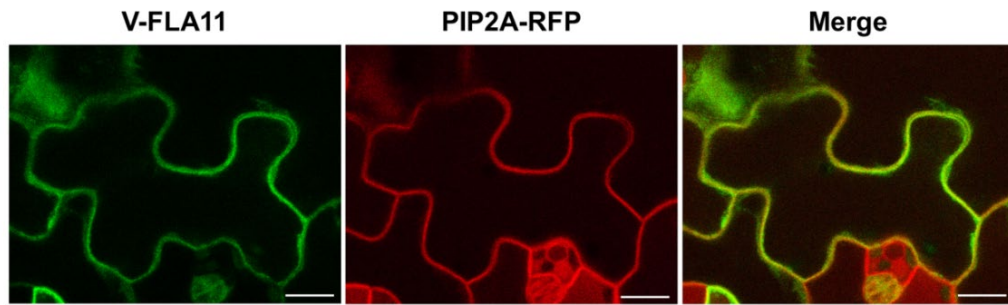

**Supplemental Figure S6. Localization of V-FLA11 in wild-type (Col-0) seedlings.** Transient co-expression in wild-type *Arabidopsis* seedlings of V-FLA11 (left panel) and PIP2A-RFP (medium panel) (see merged image in right panel). Scale bars = 10  $\mu\text{m}$ .

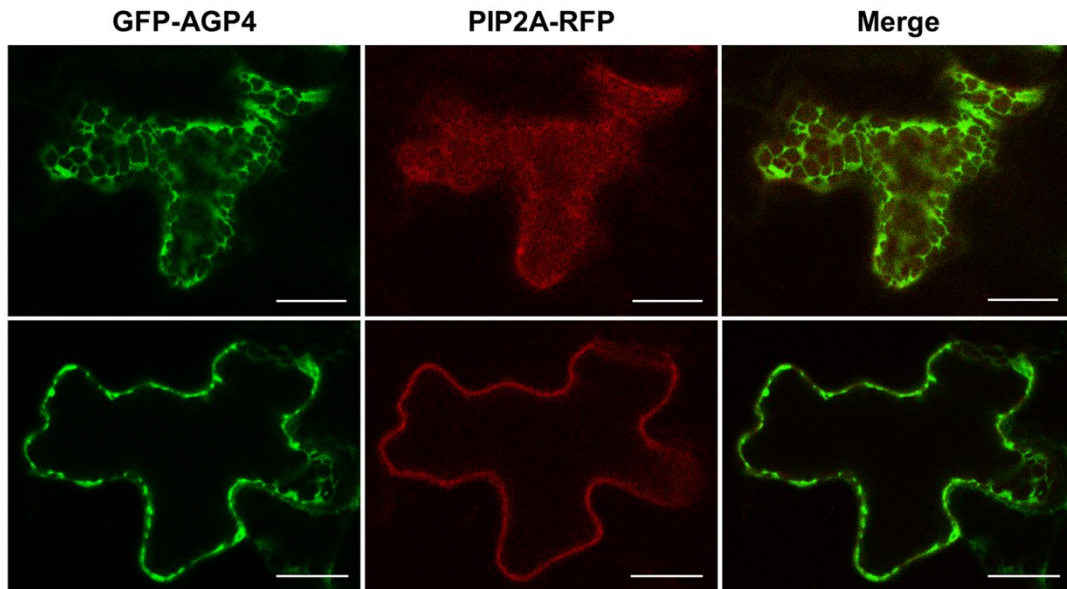

**Supplemental Figure S7. Localization of GFP-AGP4 and PIP2A-RFP *pgap1-3* seedlings.** Transient co-expression of GFP-AGP4 (left panels) and PIP2A-RFP (medium panels) in *pgap1-3* seedlings (see merged images in right panels). Scale bars = 10  $\mu$ m.



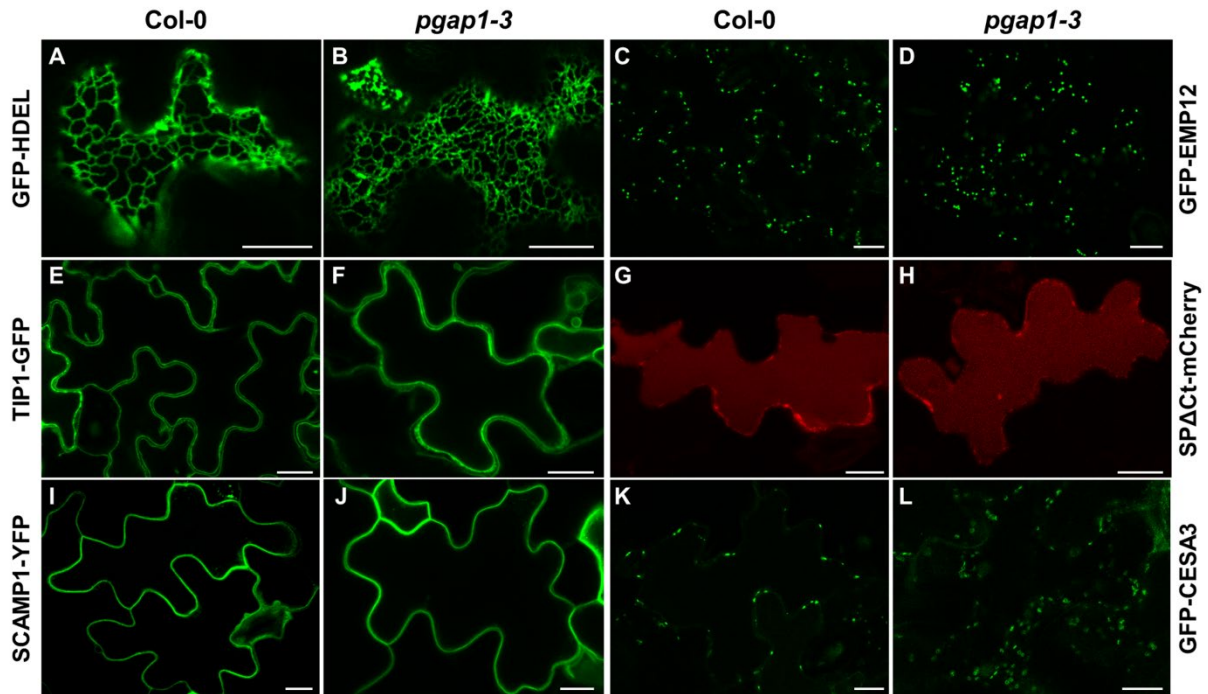

**Supplemental Figure S8. Localization of organelle marker proteins in wild-type (Col-0) and *pgap1-3*.** Transient expression in *Arabidopsis* seedlings of organelle marker proteins, including GFP-HDEL (endoplasmic reticulum) (A-B), GFP-EMP12 (Golgi apparatus) (C-D), TIP1.1-GFP (tonoplast) (E-F), SPΔCt-mCherry (vacuole lumen) (G-H), SCAMP1-YFP (plasma membrane) (I-J) or GFP-CESA3 (*trans* Golgi network (TGN)/plasma membrane) (K-L). Scale bars = 10  $\mu$ m.

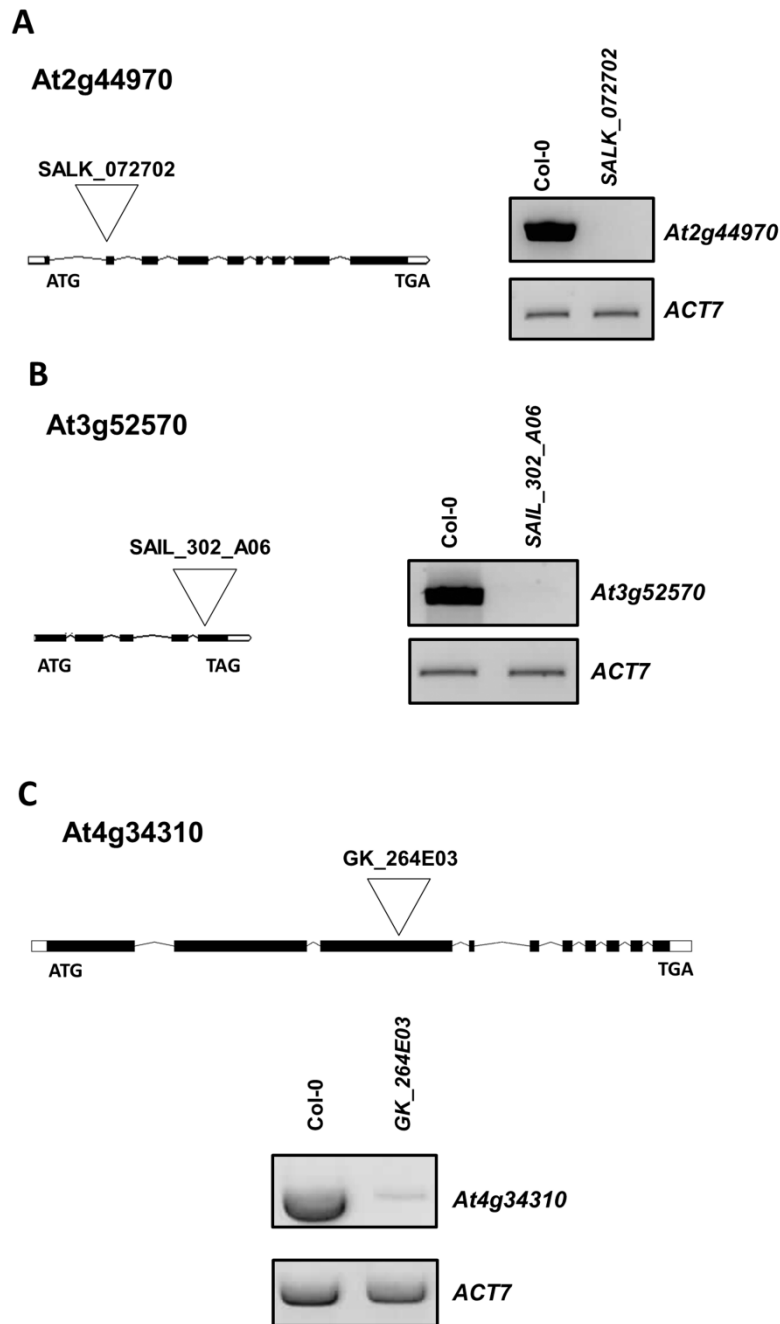

**Supplemental Figure S9. Mutants in other AB\_hydrolases genes different from *PGAPI*.** Diagram of *At2g44970* (A), *At3g52570* (B) and *At4g34310* (C). Black boxes represent coding regions, white boxes represent 5' UTR and 3' UTR regions and triangles represent the localization of the T-DNA insertion in their corresponding T-DNA mutants. RT-sqPCR analysis of *At2g44970*, *At3g52570* and *At4g34310* expression in their corresponding mutants (see Supplemental tables 2 and 3 for primers) is also shown. *Actin-7* (*ACT7*) was used as a control.

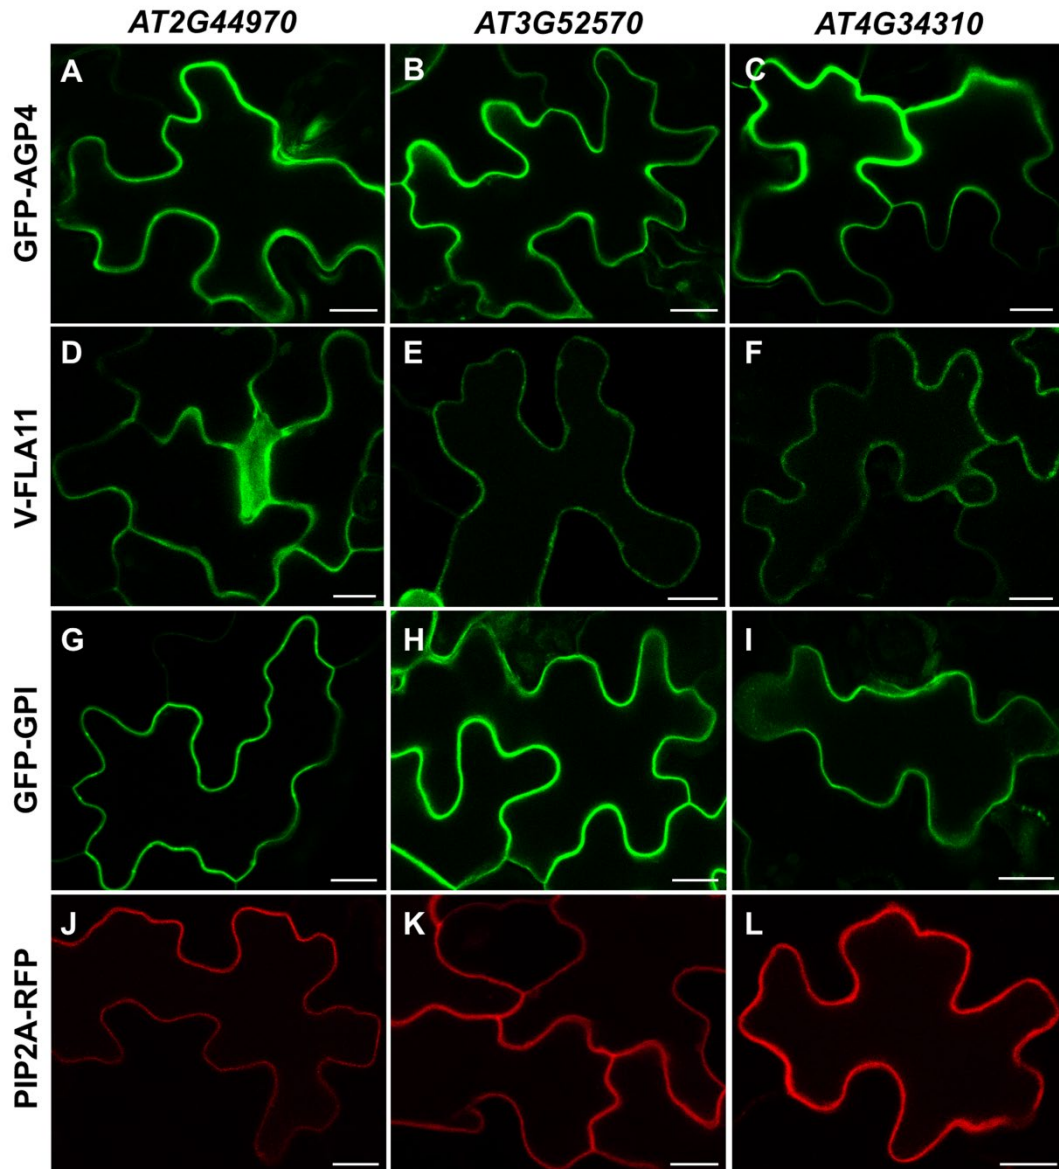

**Supplemental Figure S10. Localization of plasma membrane proteins in mutants of other AB\_hydrolases genes different from *PGAP1*.** Transient expression in *Arabidopsis* seedlings. Three different GPI-APs, GFP-AGP4 (A-C), V-FLA11 (D-F) and GFP-GPI (G-I) mainly localized to the plasma membrane in *at2g44970*, *at3g52570* and *at4g34310* mutants, similar to the transmembrane plasma membrane protein PIP2A-RFP (J-L). Scale bars = 10  $\mu$ m.

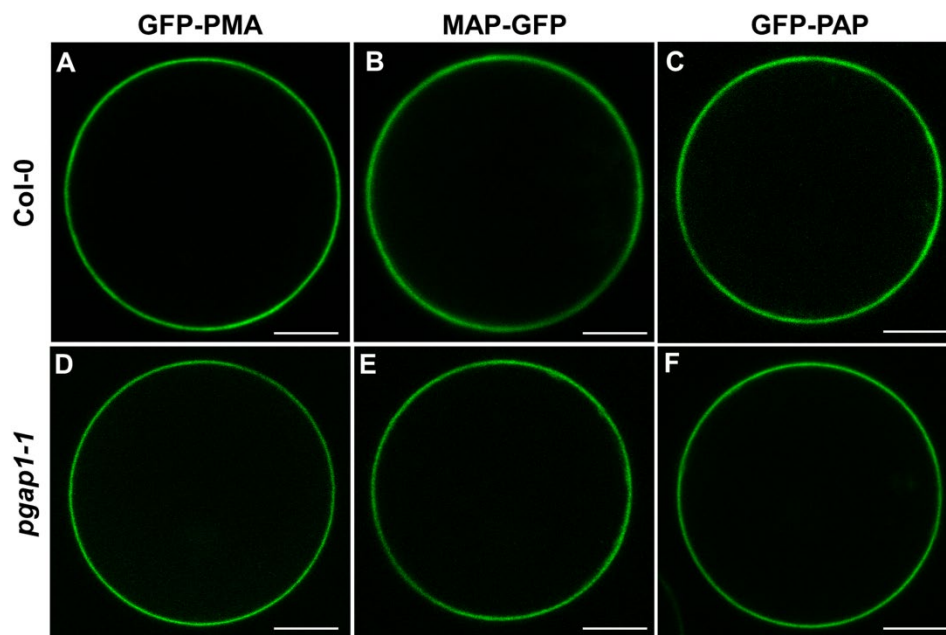

**Supplemental Figure S11. Localization of plasma membrane proteins without a GPI anchor in wild-type and *pgap1-1* protoplasts.** GFP-PMA (A, D), MAP-GFP (B, E) and GFP-PAP (C, F) localized mainly to the plasma membrane in protoplasts from both wild type (A to C) and *pgap1-1* mutant (D to F). Scale bars = 10  $\mu$ m.

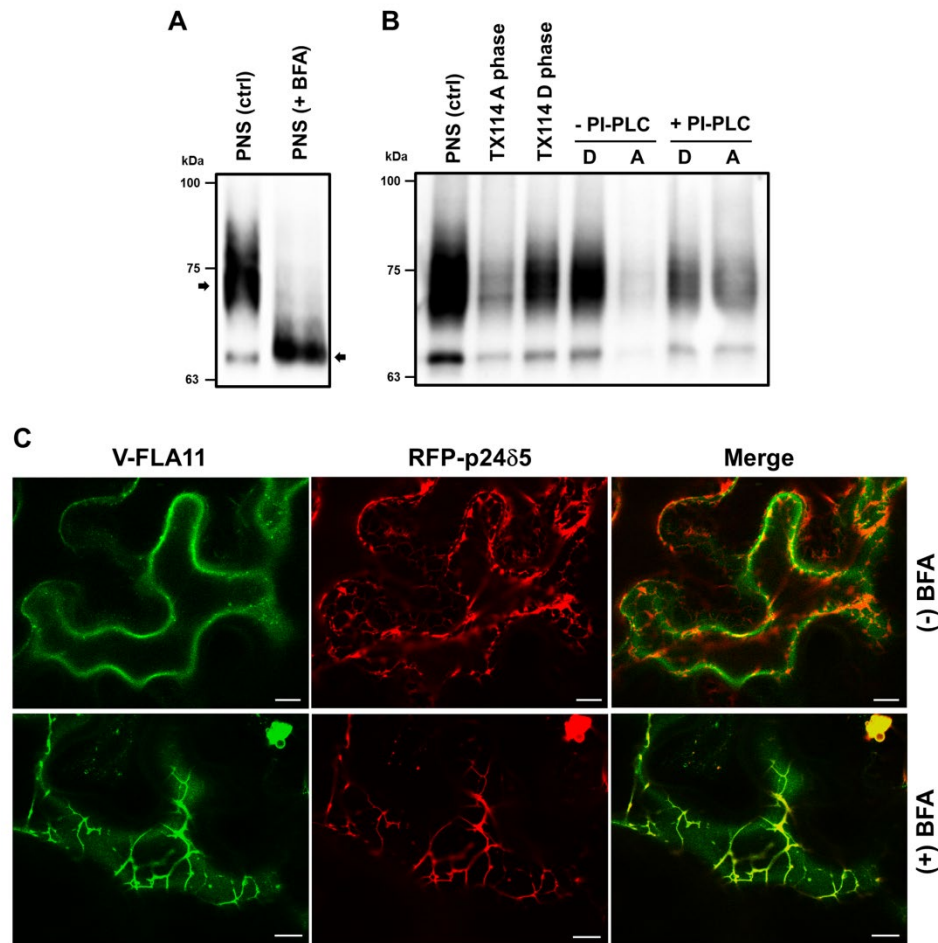

**Supplemental Figure S12. Biochemical characterization of V-FLA11.** **A.** PNSs from *N. benthamiana* leaves transiently expressing V-FLA11 and treated in the absence (PNS ctrl) or presence of BFA (PNS + BFA) were analyzed by SDS-PAGE and immunoblotting with GFP antibodies (to detect V-FLA11). Arrows show the presence of a major smear at 70-75 kDa in the absence of BFA and a 65 kDa band that was much more prominent upon BFA treatment. **B.** A PNS from *N. benthamiana* leaves expressing V-FLA11 was extracted with TX-114, and the TX-114 detergent phase was treated in the absence (-) or presence (+) of PI-PLC. After the treatment, detergent (D) and aqueous (A) phases were separated and analyzed by SDS-PAGE and immunoblotting with GFP antibodies (to detect V-FLA11). Of note, V-FLA11 mainly appears in the TX-114 detergent phase and upon PI-PLC treatment, the 70-75 kDa smear and the 65 kDa band disappeared from the detergent phase and appeared in the aqueous phase. **C.** Effect of BFA treatment on localization of V-FLA11 (left panels) and RFP-p24 $\delta$ 5 (medium panels) (see merged images in right panels) in *N. benthamiana* leaves. For the (+) BFA condition, leaves were infiltrated with BFA 2 d after agroinfiltration and left for an extra day before confocal laser microscopy analysis. For the (-) BFA condition, leaves were analyzed 3 d after agroinfiltration. Scale bars = 10  $\mu$ m.

**Table S1. Putative *Arabidopsis* GPI inositol-deacylase *PGAP1*-like genes.** For membrane topology it was used the TMpred program, (Hofmann and Stoffel, 1993) and the data for the expected subcellular localization was obtained from TAIR (Arabidopsis.org).

|                  | <b>Length<br/>(aa)</b> | <b>Membrane Topology</b>                   | <b>Expected subcellular<br/>localization</b> |
|------------------|------------------------|--------------------------------------------|----------------------------------------------|
| AT2G44970        | 503                    | Transmembrane                              | Nucleus                                      |
| AT3G29790        | 144                    | Probably not a<br>transmembrane<br>protein | Nucleus                                      |
| <b>AT3G27325</b> | <b>1121</b>            | <b>Transmembrane</b>                       | <b>ER/Plasma membrane</b>                    |
| AT3G52570        | 335                    | Probably not a<br>transmembrane<br>protein | Mitochondria                                 |
| AT4G34310        | 1228                   | Transmembrane                              | Chloroplast/Mitochondria                     |
| AT5G17670        | 309                    | Probably not a<br>transmembrane<br>protein | Chloroplast                                  |

**Table S2. Polysaccharide calculations.** The average of two technical replicates is shown for each biological replicate.

|                               |                               | Col-0<br>A  | Col-0<br>B  | <i>pgap1-3</i><br>A | <i>pgap1-3</i><br>B |
|-------------------------------|-------------------------------|-------------|-------------|---------------------|---------------------|
| <b>Pectic Polysaccharides</b> |                               |             |             |                     |                     |
| <b>Arabinan</b>               | 1,5-Ara (f)                   | 3.33        | 3.88        | 6.76                | 4.44                |
|                               | 1,3,5-Ara (f)                 | 0.47        | 0.99        | 0.82                | 1.09                |
|                               | 1,2,5-Ara (f)                 | 0.45        | 0.54        | 0.75                | 0.50                |
|                               | t-Ara                         | 0.92        | 1.54        | 1.57                | 1.59                |
|                               | <b>Total Arabinan</b>         | <b>5.16</b> | <b>6.95</b> | <b>9.90</b>         | <b>7.62</b>         |
| <b>Type I AG</b>              | 1,4-Gal (p)                   | 2.63        | 2.32        | 2.68                | 3.21                |
|                               | 1,3,4-Gal (p)                 | 0.74        | 1.21        | 0.76                | 0.90                |
|                               | 1,4,6-Gal (p)                 | 0.11        | 0.15        | 0.21                | 0.26                |
|                               | t-Ara                         | 0.85        | 1.36        | 0.97                | 1.16                |
|                               | <b>Total Type I AG</b>        | <b>4.33</b> | <b>5.05</b> | <b>4.62</b>         | <b>5.53</b>         |
| <b>Type II AG</b>             | 1,3-Gal (p)                   | 0.28        | 0.30        | 0.22                | 0.19                |
|                               | 1,6-Gal (p)                   | 1.18        | 0.52        | 0.81                | 0.81                |
|                               | 1,3,6-Gal (p)                 | 1.41        | 1.47        | 1.00                | 0.90                |
|                               | 1,3,4,6-Gal (p)               | 0.05        | 0.00        | 0.03                | 0.05                |
|                               | 1,2,3,4-Gal (p)               | 0.18        | 0.20        | 0.00                | 0.05                |
|                               | t-Ara                         | 1.86        | 1.86        | 1.07                | 1.09                |
|                               | <b>Total Type II AG</b>       | <b>4.97</b> | <b>4.34</b> | <b>3.12</b>         | <b>3.09</b>         |
| <b>Homogalacturonan</b>       | 1,4-Gal A                     | 0.04        | 0.55        | 0.41                | 0.59                |
|                               | /1,4-Gal A (OMe)              | /0.44       | /0.49       | /1.23               | /0.84               |
|                               | t-Gal A                       | 0.19        | 0.59        | 0.48                | 0.33                |
|                               | <b>Total Homogalacturonan</b> | <b>0.68</b> | <b>1.63</b> | <b>2.12</b>         | <b>1.76</b>         |
| <b>RG I</b>                   | 1,4-Gal A                     | 0.30        | 0.97        | 0.59                | 0.54                |
|                               | 1,2-Rha (p)                   | 0.07        | 0.22        | 0.14                | 0.11                |
|                               | 1,2,4-Rha (p)                 | 0.23        | 0.74        | 0.45                | 0.43                |
|                               | <b>Total RG I</b>             | <b>0.60</b> | <b>1.93</b> | <b>1.18</b>         | <b>1.08</b>         |
| <b>Glucuronoxylan</b>         | 1,4-Xyl (p)                   | 4.69        | 4.99        | 3.83                | 4.81                |
|                               | 1,2,4-Xyl (p)                 | 0.63        | 1.01        | 1.18                | 0.94                |
|                               | t-Glc A                       | 0.07        | 0.17        | 0.22                | 0.23                |
|                               | <b>Total Glucuronoxylan</b>   | <b>5.39</b> | <b>6.17</b> | <b>5.23</b>         | <b>5.97</b>         |
| <b>Heteromannan</b>           | 1,4-Man (p)                   | 2.57        | 2.53        | 2.65                | 2.45                |
|                               | 1,4,6-Man (p)                 | 0.42        | 1.01        | 0.90                | 0.86                |
|                               | 1,4-Glc (p)                   | 2.57        | 2.53        | 2.65                | 2.45                |
|                               | 1,4,6-Glc (p)                 | 0.42        | 1.01        | 0.90                | 0.86                |
|                               | t-Gal                         | 0.83        | 2.03        | 1.81                | 1.71                |
|                               | <b>Total Heteromannan</b>     | <b>6.80</b> | <b>9.12</b> | <b>8.92</b>         | <b>8.34</b>         |
| <b>Xyloglucan</b>             | 1,4,6-Glc (p)                 | 6.09        | 5.61        | 4.21                | 4.45                |
|                               | 1,4-Glc (p)                   | 6.09        | 5.61        | 4.21                | 4.45                |
|                               | 1,2-Xyl (p)                   | 1.40        | 1.33        | 1.40                | 1.39                |
|                               | 1,2-Gal (p)                   | 0.91        | 0.69        | 0.94                | 1.01                |
|                               | t-Fuc (p)                     | 0.91        | 0.69        | 0.87                | 0.94                |
|                               | t-Xyl                         | 3.23        | 3.60        | 1.94                | 2.11                |

|                  |                         |              |              |              |              |
|------------------|-------------------------|--------------|--------------|--------------|--------------|
|                  | t-Gal                   | 1.40         | 1.33         | 1.40         | 1.39         |
|                  | <b>Total Xyloglucan</b> | <b>20.01</b> | <b>18.86</b> | <b>14.98</b> | <b>15.75</b> |
| <b>Cellulose</b> | 1,4-Glc                 | 46.68        | 36.23        | 42.33        | 43.90        |
|                  | <b>Total Cellulose</b>  | <b>46.68</b> | <b>36.23</b> | <b>42.33</b> | <b>43.90</b> |
| <b>Callose</b>   | 1,3-Glc (p)             | 0.12         | 1.17         | 0.40         | 0.65         |
|                  | <b>Total Callose</b>    | <b>0.12</b>  | <b>1.17</b>  | <b>0.40</b>  | <b>0.65</b>  |
| <b>Extensin</b>  | 1,2-Ara (f)             | 1.06         | 1.66         | 1.41         | 1.27         |
|                  | 1,3-Ara (f)             | 0.40         | 0.62         | 0.53         | 0.48         |
|                  | t-Ara (f)               | 0.53         | 0.83         | 0.70         | 0.64         |
|                  | t-Gal                   | 0.13         | 0.21         | 0.18         | 0.16         |
|                  | <b>Total Extensin</b>   | <b>2.11</b>  | <b>3.32</b>  | <b>2.82</b>  | <b>2.55</b>  |
|                  | <b>Total</b>            | <b>96.85</b> | <b>94.76</b> | <b>95.62</b> | <b>96.24</b> |



**Table S3. T-DNA mutants and PCR primers used for their characterization.** Genotyping and RT-sqPCR primers used for the characterization of the mutants. Different combinations of primer pairs were used for the characterization of the mutants. The RT-sqPCR primers used in Figure 3 are in bold. RT-sqPCR analysis of *pgap1-1* showed a band of smaller molecular weight due to abnormal splicing of 14 exon due to the T-DNA insertion as detected by sequencing.

| Mutant                              | Gene      | Genotyping primers |                  | RT-sqPCR primers                                            |
|-------------------------------------|-----------|--------------------|------------------|-------------------------------------------------------------|
|                                     |           | T-DNA insertion    | Wild-type allele |                                                             |
| SALK_072702                         | AT2G44970 | LBb1/LPBst1A       | NRPBst1A/LPBst1A | NRPBst1A/LPBst1A                                            |
| SALK_078662<br>( <i>pgap1-1</i> )   | AT3G27325 | LBb1/RPBst1B       | RPBst1B/LPBst1B  | <b>RPBst1B/Bst1BR2</b><br>RPBst1B/LPBst1B<br>Bst1BF/Bst1BR2 |
| SAIL_1212_H07<br>( <i>pgap1-2</i> ) | AT3G27325 | LB3/LPBst1B        | RPBst1B/LPBst1B  | <b>RPBst1B/Bst1BR2</b><br>RPBst1B/LPBst1B<br>Bst1BF/Bst1BR2 |
| SALK_027086<br>( <i>pgap1-3</i> )   | AT3G27325 | LBb1/Bst1BF2       | Bst1BF2/Bst1BR3  | <b>Bst1BF2/Bst1BR</b><br>Bst1BF2/LPBst1B<br>Bst1BF2/Bst1BR3 |
| SALK_004218<br>( <i>pgap1-4</i> )   | AT3G27325 | LBb1/Bst1BR2       | Bst1BF/Bst1BR2   | <b>Bst1BF/Bst1BR2</b><br>RPBst1B/Bst1BR2                    |
| SAIL_302_406                        | AT3G52570 | LB3/Bst1CR         | Bst1CF/Bst1CR    | Bst1CF/Bst1CR                                               |
| GK-264E03                           | AT4G34310 | LBG/Bst1DF         | Bst1DF/Bst1DR    | Bst1D/Bst1DR                                                |

**Table S4. List of PCR primers used for the characterization of T-DNA mutants.**

| <b>Primer</b>             | <b>Gene</b>  | <b>Sequence (5' → 3')</b>    | <b>Tm (°C)</b> |
|---------------------------|--------------|------------------------------|----------------|
| NRPBst1A                  | AT2G44970    | GAAACTGTCTCCTTGTGTCTATG      | 61             |
| LPBst1A                   | AT2G44970    | CTAAAGGATAAGGTCGCTGGG        | 61             |
| RPBst1B                   | <i>PGAP1</i> | ACCAGCTTAGGTCTATTGCC         | 61             |
| LPBst1B                   | <i>PGAP1</i> | TTGGAAGGGAAATTTGAAAC         | 55             |
| Bst1BF                    | <i>PGAP1</i> | GCTCTGCAAATTGCGTTGTTTCCC     | 65             |
| Bst1BF2                   | <i>PGAP1</i> | GGCAGCAGAATCTGATAGAGCGTT     | 59             |
| Bst1BR                    | <i>PGAP1</i> | ACGAGACCACTGTGAAGCTTGTGAG    | 61             |
| Bst1BR2                   | <i>PGAP1</i> | CTTTCTTTTGATGCCATCATA        | 51             |
| Bst1BR3                   | <i>PGAP1</i> | CAACAACCTCCGGATAGTAATGGGT    | 57             |
| Bst1CF                    | AT3G52570    | ACAGCTCTCATCCTTCATGG         | 65             |
| Bst1CR                    | AT3G52570    | CCATTTTCGTAGCGCATCGT         | 65             |
| Bst1DF                    | AT4G34310    | AGCTAAAGGAGCTAGCCTACCTAA     | 56             |
| Bst1DR                    | AT4G34310    | TCCAGACCATTCCGTGAGGTTTGT     | 60             |
| <i>Housekeeping genes</i> |              |                              |                |
| A5                        | <i>ACT-7</i> | GGATCCAATGGCCGATGGTGAGG      | 69             |
| A3                        | <i>ACT-7</i> | GGAAAACCTCACCACCACGAACCAG    | 67             |
| <i>Insertion</i>          |              |                              |                |
| LBb1                      | T-DNA        | GGATCCGCGTGGACCGCTTGCTGCAACT | 76             |
| LB3                       | T-DNA        | TTCATAACCAATCTCGATACAC       | 55             |
| LBG                       | T-DNA        | ATATTGACCATCATACTCATTGC      | 51             |
